# Supplementary material
Source: PubMed Central journal article supplement (PMC5344077)
Supplement: supp_WNL.0000000000003632_Table_e-1.pdf [file supp_WNL.0000000000003632_Table_e-1.pdf]

TABLE E-1 | Prevalence of MRI abnormalities across FCD and healthy controls

| Modalities and features                         |                       | z  > 1.5 |          |          |
|-------------------------------------------------|-----------------------|----------|----------|----------|
|                                                 |                       | Type IIA | Type IIB | Controls |
| T1weighted - thickness, curvature, sulcal depth |                       | 33%      | 75%      | 0%       |
| Structural MRI - T1weighted & FLAIR             |                       |          |          |          |
| normalized intensity                            | <i>Cortical</i>       | 11%      | 33%      | 0%       |
|                                                 | <i>Subcortical</i>    | 44%      | 88%      | 2%       |
| vertical gradient                               | <i>Cortical</i>       | 0%       | 42%      | 0%       |
|                                                 | <i>GM-WM boundary</i> | 44%      | 79%      | 2%       |
| horizontal gradient                             | <i>Cortical</i>       | 11%      | 13%      | 0%       |
|                                                 | <i>GM-WM boundary</i> | 22%      | 50%      | 0%       |
| Diffusion MRI - FA & MD                         | <i>Cortical</i>       | 11%      | 13%      | 0%       |
|                                                 | <i>Subcortical WM</i> | 44%      | 33%      | 2%       |
| FMRI - ALFF & ReHo                              | <i>Cortical</i>       | 11%      | 46%      | 0%       |
| Multimodal combination                          |                       | 78%      | 88%      | 0%       |

For individual analysis, features (*i.e.*, absolute z-scores  $\geq 1.5$ ) and feature combinations (*i.e.*, multivariate z-scores  $\geq 1.5$ ) are averaged across surfaces. *Abbreviations*: FA: fractional anisotropy; MD: mean diffusivity; ALFF: amplitude of local functional fluctuation; ReHo: regional homogeneity.
